# Supplementary material
Source: publisher figshare collection journal article supplement (https://karger.figshare.com/ndownloader/files/28840032)
Supplement: Supplementary file 1 [file 28840032]

**Supplemental File 3. Database search terms.**

**Pubmed: December 3, 2020**

((((neonate) OR (newborn)) OR (infant)) AND (((death) OR (mortality)) AND (((((artificial intelligence) OR (machine learning)) OR (deep learning))

**OVID: December 16, 2020**

(newborn and mortality and machine learning).af.

**Cochrane: December 18, 2020**

newborn AND mortality AND machine learning

**Google Scholar: December 21, 2020**

machine learning, death, neonate
